# Supplementary material for: Sucrose Transporter StSUT2 Affects Potato Plants Growth, Flowering Time, and Tuber Yield
Source: MDPI journal article supplement (doi:10.3390/cimb45030172), 2023-03-22
Supplement: s1 [file s1]

**Table S1.** Primers sequence.

| Genes ID/name                    | Gene description                                                 | Forward primer            | Reverse primer             |
|----------------------------------|------------------------------------------------------------------|---------------------------|----------------------------|
| StSUT1                           | Sucrose transporter 1 in <i>Solanum tuberosum</i>                | TTCCATAGCTGCTGGTG<br>TTC  | TACCAGAAATGGGTCC<br>ACAA   |
| StSUT2                           | Sucrose transporter 2 in <i>Solanum tuberosum</i>                | GGCATTCTCTTGCTGTA<br>ACC  | GCGATACAACCATCTG<br>AGGTAC |
| StSUT4                           | Sucrose transporter 4 in <i>Solanum tuberosum</i>                | GCTCTTGGGCTTGGACA<br>AGGC | GGCTGGTGAATTGCCT<br>CCACC  |
| <i>ef1α</i>                      | <i>ef1α</i> in <i>Solanum tuberosum</i>                          | CAAGGATGACCCAGCC<br>AAG   | TTCCTTACCTGAACGC<br>CTGT   |
| PGSC0003DMG400021877/StXT<br>H2  | Xyloglucan endotransglucosylase/hydrolase<br>2                   | AATGCTGATGATTGGGC<br>CACA | AGCTTTGGGCCATGTA<br>GTTTC  |
| PGSC0003DMG400026189/StXT<br>H9  | Xyloglucan endotransglucosylase/hydrolase<br>protein 9           | AGATGAGACCCCTGTTC<br>GTGT | CGCCTTGTGTAGCCCA<br>ATCAT  |
| PGSC0003DMG400004109/StXT<br>H33 | Probable xyloglucan<br>endotransglucosylase/hydrolase protein 33 | CAGGATTGGATTGGGCT<br>AGGA | CACGGTATGCTTTGTCC<br>ACTA  |
| PGSC0003DMG400011222/StG<br>ALE  | UDP-glucuronate 4-epimerase 1                                    | TGTTTCCGTCTACACCTG<br>GGA | TGCCCATAGAAACATC<br>GTGCT  |
| PGSC0003DMG400023732/StU<br>GTs) | UDP-glucuronosyl and UDP-glucosyl<br>transferase                 | TTGGGTAATACGTCTCC<br>GGTG | CCAACATCGCAACCAT<br>CATCG  |
| PGSC0003DMG401024140/StPA<br>E   | Pectin acetyltransferase 8-like                                  | TATTTTCAGGGAGGAGG<br>TTGG | CTGAGAATCCCTGAGA<br>AAGCG  |
| PGSC0003DMG400015933/StPP<br>E8  | Pectinesterase/pectinesterase inhibitor<br>PPE8B-like            | TCGATGGCACAAACGG<br>ACTAG | GGGGCGGACCATAAG<br>AAGAAT  |
| PGSC0003DMG400031816/StPE<br>I   | Probable pectinesterase/pectinesterase<br>inhibitor 41           | GTAGGCCATGGAAAGA<br>GTACT | AATCTCCAGACCAATC<br>GTGCC  |
| PGSC0003DMG400018635/StEX<br>P   | Expansin-like A1                                                 | CAGTGTGATGTTGCTC<br>AGGT  | AGTCCAGTTCGACGA<br>TCCAA   |
| PGSC0003DMG401027116/StL<br>AC12 | Laccase-12-like                                                  | CAAGCACATCACCAGG<br>GAATA | AAAGAGGTTGCCAGA<br>GTGTCC  |

**Table S2.** 152 differentially expressed genes (DEGs) between StSUT2 RNAi line2 and WT. Genes with log2 fold change  $\geq 1$  with P value  $< 0.01$  were regarded as DEGs. Three biological replicates were averaged.

| Gene ID              | Functional annotation                                | Log <sub>2</sub> fold change | Fold change  | FDR p-value |
|----------------------|------------------------------------------------------|------------------------------|--------------|-------------|
| PGSC0003DMG400000386 | Leucine-rich repeat extensin-like protein 3          | 1.312830164                  | 2.484284093  | 0.002008144 |
| PGSC0003DMG400000408 | Xyloglucan endotransglucosylase/hydrolase protein 31 | 1.411889279                  | 2.660853865  | 0.000403251 |
| PGSC0003DMG400000818 | Lysine histidine transporter-like 6                  | 1.31550654                   | 2.488897022  | 0.006029805 |
| PGSC0003DMG400000827 | Galacturonosyltransferase-like 3                     | 1.496999317                  | 2.822550351  | 0.000780393 |
| PGSC0003DMG400000922 | Myb family transcription factor                      | -1.295792877                 | -2.455118869 | 0.006209645 |
| PGSC0003DMG400001417 | Homeobox-leucine zipper protein HAT7                 | 1.269952647                  | 2.411536501  | 0.007428824 |
| PGSC0003DMG400001462 | Protein LONGIFOLIA 1                                 | 1.26361126                   | 2.400959819  | 0.006668159 |
| PGSC0003DMG400001598 | Snakin-2                                             | 1.554435931                  | 2.937188652  | 0.000418436 |
| PGSC0003DMG400001634 | Protein FAF-like                                     | 1.128717441                  | 2.186642608  | 0.000274496 |
| PGSC0003DMG400001830 | Receptor-like protein 9DC3                           | 1.499805063                  | 2.828044973  | 0.000773618 |
| PGSC0003DMG400001990 | Putative late blight resistance protein homolog      | 1.951139293                  | 3.866797712  | 1.06E-10    |
| PGSC0003DMG400002420 | Elongation of fatty acids protein 3-like             | 1.925881132                  | 3.799688451  | 2.26E-06    |
| PGSC0003DMG400002519 | GDSL esterase/lipase APG                             | 1.413820921                  | 2.6644189    | 0.000495133 |
| PGSC0003DMG400002883 | Axial regulator YABBY 5                              | 1.671125157                  | 3.184628657  | 1.00E-05    |
| PGSC0003DMG400002999 | Protein FAF-like                                     | 1.323746401                  | 2.503152871  | 0.000468424 |
| PGSC0003DMG400003188 | Serine carboxypeptidase                              | 1.023386864                  | 2.032685285  | 0.006372868 |
| PGSC0003DMG400003522 | Galactinol synthase 2                                | 1.37511104                   | 2.593878745  | 0.001361314 |
| PGSC0003DMG400004109 | Xyloglucan endotransglucosylase/hydrolase protein 33 | 1.577948947                  | 2.985451118  | 0.000318645 |

|                      |                                                   |              |              |             |
|----------------------|---------------------------------------------------|--------------|--------------|-------------|
| PGSC0003DMG400004252 | Protein STAY-GREEN                                | -1.362133991 | -2.570651414 | 0.002119065 |
| PGSC0003DMG400004670 | Xyloglucan endotransglucosylase/hydrolase 2       | -1.444254069 | -2.721220889 | 7.90E-05    |
| PGSC0003DMG400004957 | Unknown Function                                  | 1.480198893  | 2.789871924  | 0.000780393 |
| PGSC0003DMG400005130 | Unknown Function                                  | 1.217829074  | 2.325964494  | 0.007424572 |
| PGSC0003DMG400005156 | Putative F-box protein                            | -1.302334791 | -2.466276907 | 0.000150016 |
| PGSC0003DMG400005688 | Regulator of Vps4 activity in the MVB pathway     | 1.369010644  | 2.582933757  | 1.00E-05    |
| PGSC0003DMG400006890 | Unknown Function                                  | 1.271171441  | 2.413574637  | 0.003717846 |
| PGSC0003DMG400007239 | BTB/POZ domain-containing protein DOT             | 1.443473934  | 2.719749791  | 0.000780393 |
| PGSC0003DMG400007244 | GDSL esterase/lipase                              | 1.682522116  | 3.209886123  | 8.39E-05    |
| PGSC0003DMG400007385 | Disease resistance protein                        | 1.303851989  | 2.468871911  | 0.006607122 |
| PGSC0003DMG400007972 | Abscisic acid 8- hydroxylase                      | 1.267981232  | 2.408243433  | 4.54E-05    |
| PGSC0003DMG400008021 | Protein phosphatase 2C                            | 1.408661114  | 2.654906612  | 0.002028627 |
| PGSC0003DMG400008110 | Protein indeterminate-domain 9                    | 1.254011688  | 2.385037067  | 0.008622626 |
| PGSC0003DMG400008224 | Glutaredoxin-C6                                   | 1.013193684  | 2.018374219  | 0.006613075 |
| PGSC0003DMG400008381 | Unknown Function                                  | 1.818287137  | 3.526622459  | 1.00E-05    |
| PGSC0003DMG400009888 | Mechanosensitive ion channel protein 8            | 1.123023019  | 2.178028782  | 0.009859787 |
| PGSC0003DMG400009985 | Serine/threonine-protein kinase PIX13             | 1.196659987  | 2.292084112  | 1.02E-05    |
| PGSC0003DMG400010158 | Kinase-interacting family protein                 | 1.789971585  | 3.458080815  | 1.32E-05    |
| PGSC0003DMG400010406 | Unknown Function                                  | 1.441807531  | 2.716610124  | 0.001414627 |
| PGSC0003DMG400010762 | Monothiol glutaredoxin-S1                         | 1.657326663  | 3.154314833  | 2.63E-05    |
| PGSC0003DMG400010764 | Monothiol glutaredoxin-S1                         | 1.695575104  | 3.239059801  | 6.54E-06    |
| PGSC0003DMG400010798 | Staygreen protein                                 | -1.269914382 | -2.41147254  | 0.0081065   |
| PGSC0003DMG400010819 | 3-ketoacyl-CoA synthase 1                         | 1.475279859  | 2.780375734  | 0.000673583 |
| PGSC0003DMG400010870 | NAC domain-containing protein 22                  | 1.290497351  | 2.44612368   | 0.000418436 |
| PGSC0003DMG400011133 | Transcription factor bHLH66                       | 1.044018565  | 2.061963171  | 0.00151353  |
| PGSC0003DMG400011222 | UDP-glucuronate 4-epimerase 1                     | 1.346089027  | 2.542220251  | 0.002366968 |
| PGSC0003DMG400011230 | Unknown Function                                  | 1.252716548  | 2.382896926  | 4.05E-09    |
| PGSC0003DMG400011287 | Methyladenine glycosylase                         | 1.459711014  | 2.750532622  | 0.000780393 |
| PGSC0003DMG400012195 | Unknown Function                                  | 1.290676511  | 2.446427469  | 5.42E-05    |
| PGSC0003DMG400012316 | Respiratory burst oxidase homolog protein A       | 2.01922578   | 4.053661944  | 7.72E-14    |
| PGSC0003DMG400012479 | Protein NRT1/ PTR FAMILY 6.3                      | 1.489561035  | 2.808035228  | 0.000240715 |
| PGSC0003DMG400012547 | ABC transporter G family member 11                | 1.065533507  | 2.092943705  | 0.00350311  |
| PGSC0003DMG400012641 | BAG family molecular chaperone regulator 3        | 1.315485429  | 2.488860602  | 0.006029805 |
| PGSC0003DMG400013549 | Auxin-responsive protein SAUR72                   | 1.315912137  | 2.489596845  | 0.0001282   |
| PGSC0003DMG400014408 | Fasciclin-like arabinogalactan protein 1          | 1.16895055   | 2.248480777  | 0.004772605 |
| PGSC0003DMG400014621 | Transcription factor bHLH153                      | 1.257227363  | 2.390359091  | 0.003877606 |
| PGSC0003DMG400014850 | 14 kDa proline-rich protein DC2.15                | 1.718174711  | 3.290198695  | 2.63E-05    |
| PGSC0003DMG400014869 | Formin-like protein 6                             | 1.170736987  | 2.251266714  | 0.009290829 |
| PGSC0003DMG400015194 | Malate synthase, glyoxysomal                      | 1.142115272  | 2.207043817  | 0.001012258 |
| PGSC0003DMG400015523 | Chitinase 2                                       | 1.096226384  | 2.137947437  | 0.000289299 |
| PGSC0003DMG400015933 | Pectinesterase/pectinesterase inhibitor PPE8B     | 1.220586446  | 2.330414278  | 0.003868046 |
| PGSC0003DMG400016032 | Monothiol glutaredoxin-S2                         | 1.33065011   | 2.51515988   | 0.003989929 |
| PGSC0003DMG400016033 | Monothiol glutaredoxin-S                          | 1.497551983  | 2.823631817  | 7.79E-05    |
| PGSC0003DMG400016249 | $\omega$ -hydroxypalmitate O-feruloyl transferase | 1.640399314  | 3.117521077  | 0.000112599 |
| PGSC0003DMG400016608 | Transcription factor bHLH62                       | 1.810738632  | 3.508218566  | 7.89E-07    |
| PGSC0003DMG400016828 | Protein EXORDIUM-like 5                           | 1.77408541   | 3.420211188  | 2.07E-05    |
| PGSC0003DMG400016915 | Non-symbiotic hemoglobin 2                        | 1.029906881  | 2.041892453  | 0.001087283 |
| PGSC0003DMG400017291 | LRR receptor-like serine/threonine-protein kinase | 1.614662825  | 3.062400191  | 5.74E-05    |
| PGSC0003DMG400017373 | Unknown Function                                  | 1.338378416  | 2.528669375  | 0.001649108 |
| PGSC0003DMG400017763 | Serine/threonine-protein kinase SAPK2             | 1.421509297  | 2.67865596   | 0.001697384 |
| PGSC0003DMG400018128 | Unknown Function                                  | 1.179836434  | 2.265510903  | 0.009159219 |
| PGSC0003DMG400018220 | PCTP-like protein                                 | 1.25272903   | 2.382917543  | 0.007307961 |
| PGSC0003DMG400018635 | Expansin-like A1                                  | 1.423433528  | 2.682231069  | 0.001418976 |
| PGSC0003DMG400018641 | 24-methylenesterol C-methyltransferase 2          | 1.223211048  | 2.334657709  | 0.001372518 |
| PGSC0003DMG400018884 | Calcium-binding protein K1C                       | 1.16953749   | 2.249395726  | 1.49E-07    |
| PGSC0003DMG400019212 | DELLA protein GAI                                 | 1.391725104  | 2.62392249   | 0.000761076 |
| PGSC0003DMG400019257 | Thiamine thiazole synthase 1                      | 1.313246581  | 2.485001256  | 0.000108727 |
| PGSC0003DMG400019432 | Unknown Function                                  | 1.100019172  | 2.143575411  | 0.0081065   |
| PGSC0003DMG400019861 | Transcription factor bHLH137                      | 1.728469864  | 3.313761712  | 3.42E-09    |
| PGSC0003DMG400020589 | UDP-glucuronate 4-epimerase 6                     | 1.232965193  | 2.350495947  | 0.009290829 |
| PGSC0003DMG400021512 | Acyl-CoA-binding domain-containing protein 3      | -1.164027989 | -2.240821901 | 0.004908583 |

|                      |                                                     |              |              |             |
|----------------------|-----------------------------------------------------|--------------|--------------|-------------|
| PGSC0003DMG400021798 | Unknown Function                                    | 1.895265418  | 3.719904072  | 4.78E-09    |
| PGSC0003DMG400021877 | Xyloglucan endotransglucosylase/hydrolase 2         | 1.636585755  | 3.109291236  | 0.000150016 |
| PGSC0003DMG400021886 | Unknown Function                                    | 1.219473172  | 2.328616678  | 0.001812988 |
| PGSC0003DMG400022294 | Glycerophosphodiester phosphodiesterase GDPDL4      | 1.183189118  | 2.270781854  | 0.009066877 |
| PGSC0003DMG400022312 | GDSL esterase/lipase                                | 1.022504795  | 2.031442874  | 0.005277012 |
| PGSC0003DMG400022371 | Keratin                                             | 1.374607748  | 2.592974014  | 0.002281401 |
| PGSC0003DMG400022555 | Ubiquitin-conjugating enzyme                        | 1.252071933  | 2.381832454  | 0.001405589 |
| PGSC0003DMG400022677 | CASP-like protein 1E2                               | 1.389862627  | 2.620537269  | 0.000154138 |
| PGSC0003DMG400022990 | Receptor-like protein EIX2                          | 1.328383363  | 2.51121119   | 0.002005927 |
| PGSC0003DMG400023144 | Aspartyl protease family protein                    | 1.096091591  | 2.137747695  | 0.002160494 |
| PGSC0003DMG400023458 | Phenylalanine ammonia-lyase                         | -1.206178049 | -2.307255941 | 0.0081065   |
| PGSC0003DMG400023508 | Receptor-like protein kinase HERK 1                 | 1.335106804  | 2.522941586  | 7.33E-05    |
| PGSC0003DMG400023620 | Glutamine synthetase cytosolic isozym               | 1.408192296  | 2.654044014  | 3.90E-08    |
| PGSC0003DMG400023732 | UDP-glucuronosyl and UDP-glucosyl transferase       | -1.196907505 | -2.29247739  | 2.23E-07    |
| PGSC0003DMG400024447 | MDIS1-interacting receptor like kinase 2            | 1.097833509  | 2.140330383  | 0.001283576 |
| PGSC0003DMG400024575 | TORTIFOLIA1-like protein 3                          | 1.298314484  | 2.459413788  | 0.00641985  |
| PGSC0003DMG400024875 | Unknown Function                                    | 1.457586939  | 2.746486002  | 7.20E-05    |
| PGSC0003DMG400025030 | Receptor-like protein kinase THESEUS 1              | 1.620442104  | 3.074692437  | 0.000157582 |
| PGSC0003DMG400025102 | Proline-rich receptor-like protein kinase PERK10    | 1.091171138  | 2.130469116  | 0.004675913 |
| PGSC0003DMG400025336 | Protein NRT1/ PTR FAMILY 2.11                       | 1.163251626  | 2.239616363  | 0.001641716 |
| PGSC0003DMG400025587 | ATP-citrate synthase alpha chain protein 2          | 1.264428381  | 2.402320073  | 0.009006742 |
| PGSC0003DMG400025843 | Uncharacterized acetyltransferase                   | -1.280427073 | -2.429108738 | 0.006372868 |
| PGSC0003DMG400025867 | LRR receptor-like serine/threonine-protein kinase   | 1.052530608  | 2.074164918  | 0.009290829 |
| PGSC0003DMG400026189 | Xyloglucan endotransglucosylase/hydrolase protein 9 | 1.590714553  | 3.011984933  | 0.000268587 |
| PGSC0003DMG400026220 | Expansin-like B1                                    | -1.541201501 | -2.91036783  | 0.000380367 |
| PGSC0003DMG400026224 | Non-symbiotic hemoglobin 2                          | 1.591645902  | 3.013929983  | 6.54E-06    |
| PGSC0003DMG400026289 | Protein ENHANCED DISEASE RESISTANCE 2               | 1.432511642  | 2.699162138  | 0.000157582 |
| PGSC0003DMG400026300 | Histidine decarboxylase                             | -1.434340724 | -2.702586369 | 0.001614153 |
| PGSC0003DMG400026750 | Serine/threonine-protein kinase BRI1-lik            | 1.340836212  | 2.532980924  | 0.000383216 |
| PGSC0003DMG400027340 | P450 77A1 precursor                                 | 1.495455478  | 2.819531533  | 2.80E-14    |
| PGSC0003DMG400027839 | Unknown Function                                    | -1.4314296   | -2.697138487 | 0.000268587 |
| PGSC0003DMG400027916 | Inositol-3-phosphate synthase                       | 1.371675712  | 2.58770958   | 3.76E-06    |
| PGSC0003DMG400028026 | Protein NRT1/ PTR FAMILY 6.1                        | 1.57291234   | 2.975046752  | 0.000112599 |
| PGSC0003DMG400029738 | $\beta$ -xylosidase/alpha-L-arabinofuranosidase 2   | 1.11641485   | 2.168075279  | 0.000833426 |
| PGSC0003DMG400030640 | Unknown Function                                    | 1.23749704   | 2.357891021  | 0.008677362 |
| PGSC0003DMG400030808 | Protein EXORDIUM-like                               | 1.371868015  | 2.58805453   | 0.002005927 |
| PGSC0003DMG400030826 | Protein EXORDIUM-like                               | 1.399549739  | 2.638192321  | 0.002280477 |
| PGSC0003DMG400031420 | Cytokinin dehydrogenase 7                           | 1.268113729  | 2.408464616  | 2.63E-05    |
| PGSC0003DMG400031731 | $\omega$ -hydroxypalmitate O-feruloyl transferase   | -1.305117427 | -2.471038394 | 0.006613075 |
| PGSC0003DMG400031816 | Pectinesterase/pectinesterase inhibitor 41          | 1.521324552  | 2.870544761  | 9.06E-05    |
| PGSC0003DMG400032155 | Linoleate 13S-lipoxygenase 2-1                      | 1.106646259  | 2.153444675  | 0.009838253 |
| PGSC0003DMG400032510 | L-ascorbate oxidase                                 | 1.27938079   | 2.427347719  | 0.003235019 |
| PGSC0003DMG400032534 | Unknown Function                                    | 1.408890164  | 2.655328152  | 0.001446829 |
| PGSC0003DMG400032817 | Squamosa promoter-binding protein 1                 | 2.044051903  | 4.12402164   | 4.21E-07    |
| PGSC0003DMG400033590 | Protein PELPK1                                      | -1.294042118 | -2.452141307 | 0.00640728  |
| PGSC0003DMG400033591 | Proteoglycan 4-like isoform X4                      | -1.285476887 | -2.437626159 | 0.005288759 |
| PGSC0003DMG400034309 | Non-specific lipid transfer protein GPI-anchored 1  | 1.091160742  | 2.130453764  | 0.009808963 |
| PGSC0003DMG400039158 | Unknown Function                                    | 1.292447785  | 2.449432924  | 0.00426552  |
| PGSC0003DMG401000895 | Chlorophyllide a oxygenase                          | -1.300894884 | -2.463816625 | 0.006372868 |
| PGSC0003DMG401008665 | Carboxylesterase 15                                 | 1.101858232  | 2.146309653  | 1.15E-06    |
| PGSC0003DMG401009879 | GDSL esterase/lipase                                | 1.718898252  | 3.291849211  | 1.23E-07    |
| PGSC0003DMG401014997 | GDSL esterase/lipase                                | 1.213185893  | 2.318490625  | 0.003802601 |
| PGSC0003DMG401020115 | Fimbrin-2-like                                      | 1.308250153  | 2.476409936  | 0.005650192 |
| PGSC0003DMG401024140 | Pectin acetyltransferase 8-like                     | 1.219755277  | 2.329072061  | 0.009634419 |
| PGSC0003DMG401027116 | Laccase-12                                          | -1.609895509 | -3.052297339 | 6.52E-05    |
| PGSC0003DMG402008903 | Cyclin-dependent protein kinase inhibitor SMR4      | 1.325355616  | 2.505946502  | 0.004731237 |
| PGSC0003DMG402012350 | Protein LURP-one-related 11                         | 1.449064585  | 2.730309661  | 2.24E-07    |
| PGSC0003DMG402012500 | Homeobox-leucine zipper protein HAT4                | 1.36269052   | 2.571643251  | 0.001446829 |
| PGSC0003DMG402013304 | WEB family protein                                  | -1.507094466 | -2.842370195 | 1.01E-05    |
| PGSC0003DMG402013388 | Classical arabinogalactan protein 4-like            | -1.370152147 | -2.584978259 | 0.003165788 |
| PGSC0003DMG402020132 | Non-specific lipid-transfer protein                 | -1.596057608 | -3.023160572 | 0.000263835 |

|                                |                                              |              |             |             |
|--------------------------------|----------------------------------------------|--------------|-------------|-------------|
| PGSC0003DMG402021252           | Pentatricopeptide repeat-containing protein  | 1.682891219  | 3.210707454 | 8.39E-05    |
| PGSC0003DMG402023438           | Epoxide hydrolase                            | 1.128498787  | 2.186311227 | 1.48E-05    |
| Solanum_tuberosum_newGene_1801 | 3-hydroxybenzoate 6-hydroxylase 1-like       | 1.14280741   | 2.208102908 | 8.62E-03    |
| Solanum_tuberosum_newGene_2357 | Protein GIGANTEA-like isoform X1             | 1.289058725  | 2.443685672 | 0.0000102   |
| Solanum_tuberosum_newGene_4227 | Bidirectional sugar transporter SWEET12-like | 1.133909553  | 2.194526289 | 6.67E-03    |
| Solanum_tuberosum_newGene_4341 | Unknown Function                             | 1.164067387  | 2.240883096 | 0.008125597 |
| Solanum_tuberosum_newGene_4360 | Metalloprotease inhibitor-like               | -1.31242534  | 2.483587094 | 0.001414627 |
| Solanum_tuberosum_newGene_4390 | Inactive purple acid phosphatase 27          | -1.081007719 | 2.115513246 | 8.11E-03    |
| Solanum_tuberosum_newGene_4977 | Protein SPA1-RELATED 4-like ]                | -1.432362059 | 2.698882296 | 2.92E-04    |
| Solanum_tuberosum_newGene_6254 | Inactive poly [ADP-ribose] polymerase RCD1   | -1.165977224 | 2.243851537 | 0.000000123 |
| Solanum_tuberosum_newGene_7994 | Unknown Function                             | 1.431227599  | 2.69676087  | 9.56E-04    |
| Solanum_tuberosum_newGene_8481 | Unknown Function                             | 1.026453589  | 2.037010743 | 0.002008144 |

**Table S3.** The enriched KEGG pathway of differentially expressed genes between StSUT2 RNAi line2 and WT.

| #Kegg_pathway                               | ko_id   | KEGG_N | P-value     | Gene_id                                                                                                  |
|---------------------------------------------|---------|--------|-------------|----------------------------------------------------------------------------------------------------------|
| <b>Starch and sucrose metabolism</b>        | ko00500 | 5      | 0.008738399 | PGSC0003DMG400011222;PGSC0003DMG400015933;PGSC0003DMG400020589;PGSC0003DMG400029738;PGSC0003DMG400031816 |
| Amino sugar and nucleotide sugar metabolism | ko00520 | 3      | 0.038830822 | PGSC0003DMG400011222;PGSC0003DMG400020589;PGSC0003DMG400029738                                           |
| Glyoxylate and dicarboxylate metabolism     | ko00630 | 2      | 0.061510158 | PGSC0003DMG400015194;PGSC0003DMG400023620                                                                |
| Pentose and glucuronate interconversions    | ko00040 | 2      | 0.141156746 | PGSC0003DMG400015933;PGSC0003DMG400031816                                                                |
| Zeatin biosynthesis                         | ko00908 | 2      | 0.163163085 | PGSC0003DMG400023732;PGSC0003DMG400031420                                                                |
| Thiamine metabolism                         | ko00730 | 1      | 0.057062138 | PGSC0003DMG400019257                                                                                     |
| Linoleic acid metabolism                    | ko00591 | 1      | 0.106935112 | PGSC0003DMG400032155                                                                                     |
| Arginine biosynthesis                       | ko00220 | 1      | 0.161904319 | PGSC0003DMG400023620                                                                                     |
| Nitrogen metabolism                         | ko00910 | 1      | 0.165703127 | PGSC0003DMG400023620                                                                                     |
| Steroid biosynthesis                        | ko00100 | 1      | 0.177000067 | PGSC0003DMG400018641                                                                                     |
| Cutin, suberine and wax biosynthesis        | ko00073 | 1      | 0.180732785 | PGSC0003DMG400031731                                                                                     |
| Fatty acid elongation                       | ko00062 | 1      | 0.180732785 | PGSC0003DMG400010819                                                                                     |
| Histidine metabolism                        | ko00340 | 1      | 0.184449154 | PGSC0003DMG400026300                                                                                     |
| Carotenoid biosynthesis                     | ko00906 | 1      | 0.19550086  | PGSC0003DMG400007972                                                                                     |
| Porphyrin and chlorophyll metabolism        | ko00860 | 1      | 0.210011746 | PGSC0003DMG401000895                                                                                     |
| Alanine, aspartate and glutamate metabolism | ko00250 | 1      | 0.220728733 | PGSC0003DMG400023620                                                                                     |
| Base excision repair                        | ko03410 | 1      | 0.227795259 | PGSC0003DMG400011287                                                                                     |
| Circadian rhythm - plant                    | ko04712 | 1      | 0.227795259 | Solanum_tuberosum_newGene_2357                                                                           |
| alpha-Linolenic acid metabolism             | ko00592 | 1      | 0.234799895 | PGSC0003DMG400032155                                                                                     |
| Ascorbate and aldarate metabolism           | ko00053 | 1      | 0.238279168 | PGSC0003DMG400032510                                                                                     |

**Table 4.** The most enriched GO terms of differentially expressed genes between StSUT2 RNAi line2 and WT.

| GO_ID | GO_term | ontology | Items | p-value | Gene_ID |
|-------|---------|----------|-------|---------|---------|
|-------|---------|----------|-------|---------|---------|

|            |                                                      |                    |   |             |                                                                                                                                                                         |
|------------|------------------------------------------------------|--------------------|---|-------------|-------------------------------------------------------------------------------------------------------------------------------------------------------------------------|
| GO:0016762 | xyloglucan:xyloglucosyl transferase activity         | Molecular Function | 5 | 8.77E-07    | PGSC0003DMG400026189;PGSC0003DMG400021877;PGSC0003DMG400000408;PGSC0003DMG400004109;PGSC0003DMG400004670                                                                |
| GO:0015035 | protein disulfide oxidoreductase activity            | Molecular Function | 5 | 0.000120647 | PGSC0003DMG400010762;PGSC0003DMG400010764;PGSC0003DMG400016033;PGSC0003DMG400008224;PGSC0003DMG400016032                                                                |
| GO:0016788 | hydrolase activity, acting on ester bonds            | Molecular Function | 5 | 0.000219419 | PGSC0003DMG400007244;PGSC0003DMG401014997;PGSC0003DMG400022312;PGSC0003DMG400002519;PGSC0003DMG401009879                                                                |
| GO:0004553 | hydrolase activity, hydrolyzing O-glycosyl compounds | Molecular Function | 5 | 0.000486003 | PGSC0003DMG400004109;PGSC0003DMG400021877;PGSC0003DMG400000408;PGSC0003DMG400004670;PGSC0003DMG400026189                                                                |
| GO:0009055 | electron carrier activity                            | Molecular Function | 5 | 0.001790711 | PGSC0003DMG400008224;PGSC0003DMG400016032;PGSC0003DMG400016033;PGSC0003DMG400010764;PGSC0003DMG400010762                                                                |
| GO:0047672 | anthranilate N-benzoyltransferase activity           | Molecular Function | 1 | 0.004670586 | PGSC0003DMG400016249                                                                                                                                                    |
| GO:0050379 | UDP-glucuronate 5'-epimerase activity                | Molecular Function | 1 | 0.009319614 | PGSC0003DMG400011222                                                                                                                                                    |
| GO:0010295 | (+)-abscisic acid 8'-hydroxylase activity            | Molecular Function | 1 | 0.009319614 | PGSC0003DMG400007972                                                                                                                                                    |
| GO:0048046 | apoplast                                             | Cellular Component | 6 | 2.75E-05    | PGSC0003DMG400004670;PGSC0003DMG400021877;PGSC0003DMG400000408;PGSC0003DMG400004109;PGSC0003DMG401027116;PGSC0003DMG400026189                                           |
| GO:0005623 | cell                                                 | Cellular Component | 5 | 5.79E-05    | PGSC0003DMG400008224;PGSC0003DMG400016032;PGSC0003DMG400010762;PGSC0003DMG400016033;PGSC0003DMG400010764                                                                |
| GO:0005618 | cell wall                                            | Cellular Component | 8 | 0.000117471 | PGSC0003DMG400000408;PGSC0003DMG400015933;PGSC0003DMG400004109;PGSC0003DMG400001598;PGSC0003DMG400031816;PGSC0003DMG400026189;PGSC0003DMG400021877;PGSC0003DMG400004670 |
| GO:0005576 | extracellular region                                 | Cellular Component | 7 | 0.001356057 | PGSC0003DMG400032510;PGSC0003DMG400001598;PGSC0003DMG400026220;PGSC0003DMG4000021512;PGSC0003DMG400018635;PGSC0003DMG400015933;PGSC0003DMG400015523                     |
| GO:0042546 | cell wall biogenesis                                 | Biological Process | 5 | 1.35E-06    | PGSC0003DMG400004670;PGSC0003DMG400004109;PGSC0003DMG400021877;PGSC0003DMG400026189;PGSC0003DMG400000408                                                                |
| GO:0010411 | xyloglucan metabolic process                         | Biological Process | 5 | 1.35E-06    | PGSC0003DMG400000408;PGSC0003DMG400026189;PGSC0003DMG400021877;PGSC0003DMG400004109;PGSC0003DMG400004670                                                                |
| GO:0045454 | cell redox homeostasis                               | Biological Process | 5 | 0.000726648 | PGSC0003DMG400010762;PGSC0003DMG400010764;PGSC0003DMG400016033;PGSC0003DMG4000016032;PGSC0003DMG400008224                                                               |
| GO:0019953 | sexual reproduction                                  | Biological Process | 2 | 0.00155711  | PGSC0003DMG400018635;PGSC0003DMG400026220                                                                                                                               |
| GO:0007275 | multicellular organism development                   | Biological Process | 4 | 0.003001516 | PGSC0003DMG400033590;PGSC0003DMG400002883;PGSC0003DMG400007972;PGSC0003DMG4000033591                                                                                    |
| GO:0052837 | thiazole biosynthetic process                        | Biological Process | 1 | 0.004966194 | PGSC0003DMG400019257                                                                                                                                                    |
| GO:0045792 | negative regulation of cell size                     | Biological Process | 1 | 0.004966194 | PGSC0003DMG400010870                                                                                                                                                    |
| GO:0071555 | cell wall organization                               | Biological Process | 4 | 0.006619091 | PGSC0003DMG400021877;PGSC0003DMG400000408;PGSC0003DMG400004670;PGSC0003DMG4000026189                                                                                    |

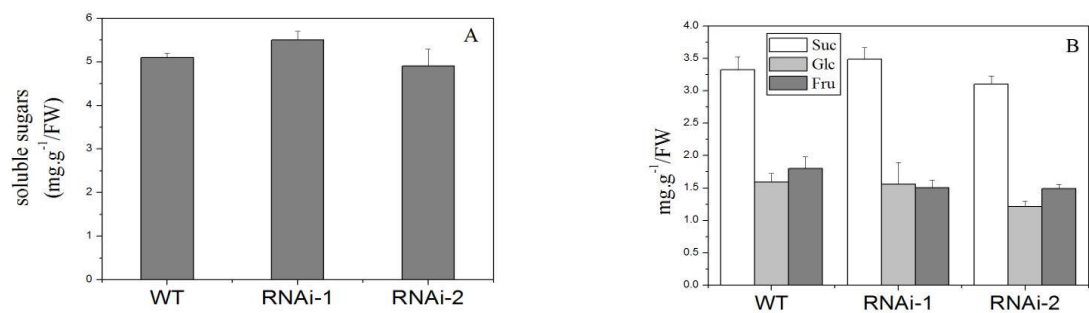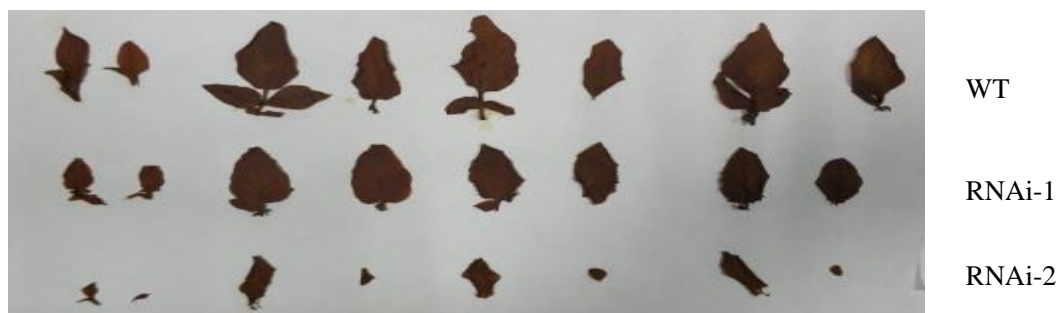

**Figure S1.** Carbohydrate content in leaves (A:Soluble sugar content; B:Sucrose, glucose and fructose content; C: Leaf starch staining).

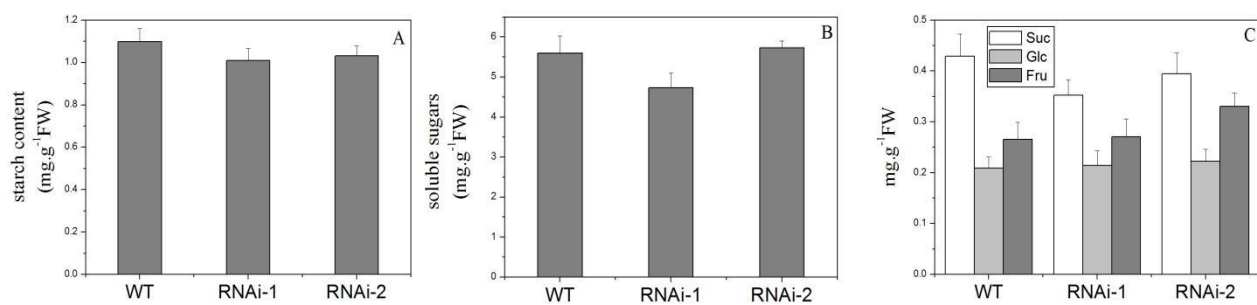

**Figure S2.** Carbohydrate content in tubers. (A:Starch content B:Soluble sugar content C:Sucrose, glucose and fructose content).
